# Supplementary material
Source: publisher site journal article supplement (https://www.spandidos-publications.com/6554/downloadSupplementary)
Supplement: Supplementary file 1 [file downloadSupplementary]

Figure S1. Histogram of nivolumab treatment dosing time. Blue is the early timing group and red is the late timing group.

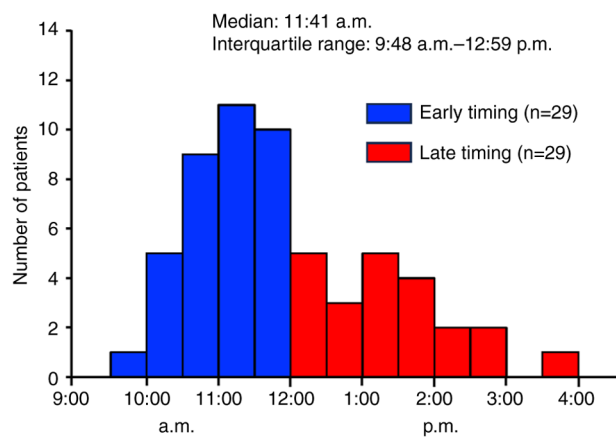

Figure S2. Kaplan-Meier curves for OS with and without concomitant medications. (A) With or without concomitant PPIs. (B) With or without concomitant NSAIDs. (C) With or without concomitant opioid analgesics. (D) With or without concomitant probiotics. (E) With or without concomitant antibiotics. The blue and red lines represent without and with, respectively. OS, overall survival; CI, confidence interval; PPI, proton pump inhibitor; NSAIDs, nonsteroidal anti-inflammatory drugs.

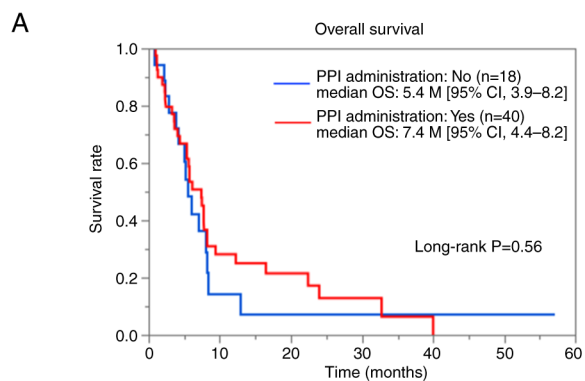

Number at risk

|          |    |    |    |   |   |   |   |   |   |
|----------|----|----|----|---|---|---|---|---|---|
| PPI: No  | 18 | 11 | 3  | 1 | 1 | 1 | 1 | 1 | 1 |
| PPI: Yes | 40 | 27 | 11 | 8 | 5 | 4 | 3 | 2 |   |

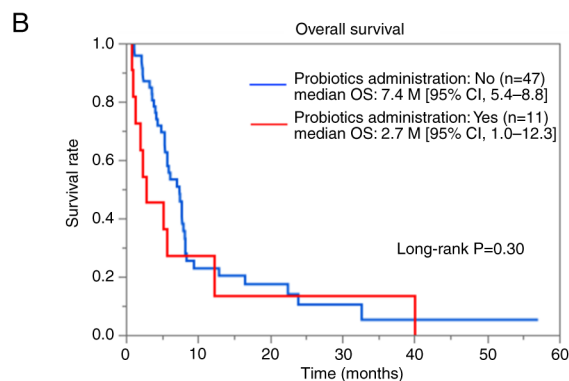

Number at risk

|                 |    |    |    |   |   |   |   |   |   |   |
|-----------------|----|----|----|---|---|---|---|---|---|---|
| Probiotics: No  | 47 | 32 | 10 | 8 | 6 | 4 | 3 | 2 | 2 | 2 |
| Probiotics: Yes | 11 | 6  | 4  | 2 | 2 | 2 | 2 | 2 |   |   |

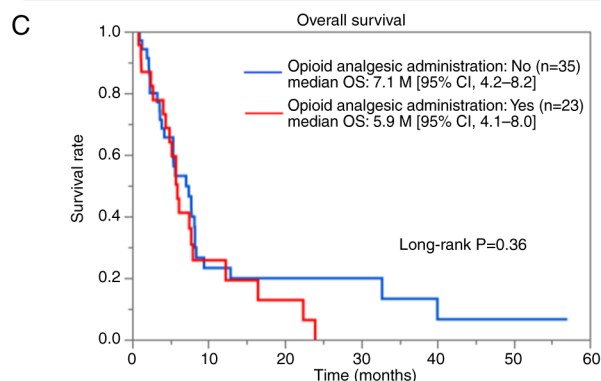

Number at risk

|             |    |    |   |   |   |   |   |   |   |   |
|-------------|----|----|---|---|---|---|---|---|---|---|
| Opioid: No  | 35 | 23 | 8 | 6 | 6 | 6 | 4 | 1 | 1 | 1 |
| Opioid: Yes | 23 | 15 | 6 | 4 | 3 |   |   |   |   |   |

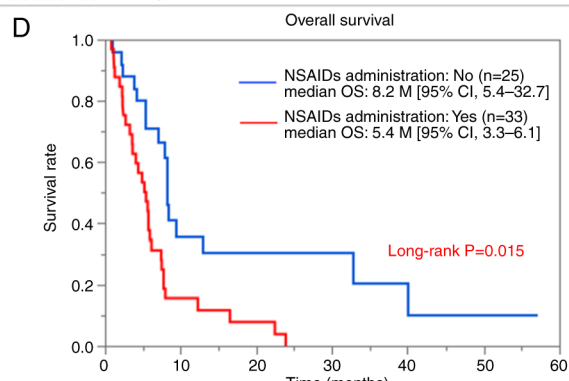

Number at risk

|             |    |    |   |   |   |   |   |   |   |   |
|-------------|----|----|---|---|---|---|---|---|---|---|
| NSAIDs: No  | 25 | 20 | 8 | 6 | 5 | 4 | 4 | 3 | 2 | 2 |
| NSAIDs: Yes | 33 | 18 | 6 | 4 | 3 |   |   |   |   |   |

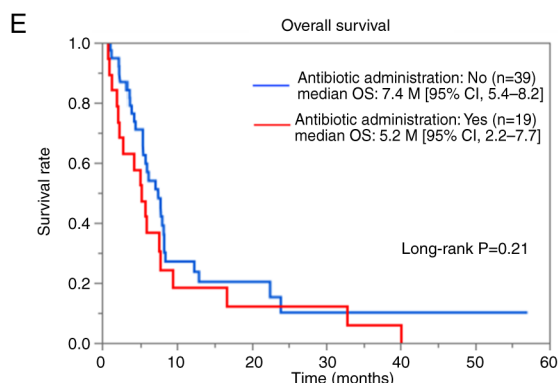

Number at risk

|                 |    |    |    |   |   |   |   |   |   |   |
|-----------------|----|----|----|---|---|---|---|---|---|---|
| Antibiotic: No  | 39 | 27 | 10 | 6 | 5 | 3 | 2 | 2 | 2 | 2 |
| Antibiotic: Yes | 19 | 11 | 4  | 3 | 3 | 3 | 3 | 2 |   |   |
